# Supplementary material for: The Transcription Factor LaMYC4 From Lavender Regulates Terpenoid Biosynthesis
Source: Research Square preprint supplement (doi:10.21203/rs.3.rs-1305323/v1), 2022-03-01
Supplement: Supplementary file 1 [file d83730c7029ca126c9fe16ac.xlsx]

## Sheet: Sheet1
Table S2 sequences of LaMYC4 and 22 MYCs from different plants
>BpMYC4
MEELIISPSSSSSLVSLPQETPPTLQQRLQFVVQSQPDWWTYAIFWQSANDDNGQMFLAWGDGHFLGTKD TSPKLSHINSTHHHHPMSVLHSERRKFMRDIQSMIITENHQDIDNMSDVTDAEWFYVMSLTRSFAPGDGV LGKAFSTNSLVWLTGGHELQYYSCERAKEAQMHGIETLVCIPTSSGILEMGSQEIIRENWGLVQQAKSLF GSDLIGLVPKQPNPSSGPMQFLDRNISFADIGIIAGVQEEDHNSQEEENKKKKKKECFKGAQSSYVDSEH SDSDCPLIAVNIEKRTPKKRGRKPGLGRDTPLNHVEAERQRREKLNHRFYALRAVVPNVSRMDKASLLSD AVSYINELKTKIDELESQLQRDSKKVKLELADTMDNQSTTTSVD…
>VvMYC4
MTQSFVNGAGLPGQALFNSSPVWVVGTERLMSSPCERARQAQVFGLQTIVCIPSANGVVELGSTELIYQS SDLMNKVRVLFNFNNLEVGSWPIGAAAPDQGESDPSSLWISDPTSNVEIKDSVNTTATGASNPIGNQQNS KSIQFENPSSSSLTENPSIMHNPQQQQQIHTQGFFTRELNFSEFGFDGNNGRNGNLHSLKPESGEILNFG DSKRSSCSANGNMFSGHSQVVAEENKKRRSPTSRGSAEEGMLSFTSGVILPSSCVVKSSGGGGDSDHSDL EASVVREADSSRVVEPEKRPRKRGRKPANGREEPLNHVEAERQRREKLNQRFYALRAVVPNVSKMDKASL LGDAISYINELRTKLQSAESDKEDLQKEVNSMKKELASKDSQYS…
>AtMYC2
MTDYRLQPTMNLWTTDDNASMMEAFMSSSDISTLWPPASTTTTTATTETTPTPAMEIPAQAGFNQETLQQRLQALIEGTHEGWTYAIFWQPSYDFSGASV LGWGDGYYKGEEDKANPRRRSSSPPFSTPADQEYRKKVLRELNSLISGGVAPSDDAVDEEVTDTEWFFLVSMTQSFACGAGLAGKAFATGNAVWVSGSDQ LSGSGCERAKQGGVFGMHTIACIPSANGVVEVGSTEPIRQSSDLINKVRILFNFDGGAGDLSGLNWNLDPDQGENDPSMWINDPIGTPGSNEPGNGAPSS SSQLFSKSIQFENGSSSTITENPNLDPTPSPVHSQTQNPKFNNTFSRELNFSTSSSTLVKPRSGEILNFGDEGKRSSGNPDPSSYSGQTQFENKRK…
>AtMYC3
MNGTTSSINFLTSDDDASAAAMEAFIGTNHHSSLFPPPPQQPPQPQFNEDTLQQRLQALIESAGENWTYAIFWQISHDFDSSTGDNTVILGWGDGYYKGE EDKEKKKNNTNTAEQEHRKRVIRELNSLISGGIGVSDESNDEEVTDTEWFFLVSMTQSFVNGVGLPGESFLNSRVIWLSGSGALTGSGCERAGQGQIYGL KTMVCIATQNGVVELGSSEVISQSSDLMHKVNNLFNFNNGGGNNGVEASSWGFNLNPDQGENDPALWISEPTNTGIESPARVNNGNNSNSNSKSDSHQIS KLEKNDISSVENQNRQSSCLVEKDLTFQGGLLKSNETLSFCGNESSKKRTSVSKGSNNDEGMLSFSTVVRSAANDSDHSDLEASVVKEAIVVEPPE…
>AtMYC4
MSPTNVQVTDYHLNQSKTDTTNLWSTDDDASVMEAFIGGGSDHSSLFPPLPPPPLPQVNEDNLQQRLQALIEGANENWTYAVFWQSSHGFAGEDNNNNNT VLLGWGDGYYKGEEEKSRKKKSNPASAAEQEHRKRVIRELNSLISGGVGGGDEAGDEEVTDTEWFFLVSMTQSFVKGTGLPGQAFSNSDTIWLSGSNALA GSSCERARQGQIYGLQTMVCVATENGVVELGSSEIIHQSSDLVDKVDTFFNFNNGGGEFGSWAFNLNPDQGENDPGLWISEPNGVDSGLVAAPVMNNGGN DSTSNSDSQPISKLCNGSSVENPNPKVLKSCEMVNFKNGIENGQEEDSSNKKRSPVSNNEEGMLSFTSVLPCDSNHSDLEASVAKEAESNRVVVEP…
>AtMYC5
MINTDDNLLMIEALLTSDPSPPLLPANLSLETTLPKRLHAVLNGTHEPWSYAIFWKPSYDDFSGEAVLKWGDGVYTGGNEEKTRGRLRRKKTILSSPEEK ERRSNVIRELNLMISGEAFPVVEDDVSDDDDVEVTDMEWFFLVSMTWSFGNGSGLAGKAFASYNPVLVTGSDLIYGSGCDRAKQGGDVGLQTILCIPSHN GVLELASTEEIRPNSDLFNRIRFLFGGSKYFSGAPNSNSELFPFQLESSCSSTVTGNPNPSPVYLQNRYNLNFSTSSSTLARAPCGDVLSFGENVKQSFE NRNPNTYSDQIQNVVPHATVMLEKKKGKKRGRKPAHGRDKPLNHVEAERMRREKLNHRFYALRAVVPNVSKMDKTSLLEDAVCYINELKSKAENVE…
>OsMYC2
MWVLLSPLLTTKNPFHPIPIPTFPLLLFSSSLVGVLFQIKSNLEEEEIEIKSMNLWTDDNASMMEAFMASADLPAFPWGAASTP PPPPPPPHHHHQQQQQQVLPPPAAAPAAAAFNQDTLQQRLQSIIEGSRETWTYAIFWQSSIDVSTGASLLGWGDGYYKGCDDDKRKQRSSTPAAAAEQEH RKRVLRELNSLIAGAGAAPDEAVEEEVTDTEWFFLVSMTQSFPNGLGLPGQALFAAQPTWIATGLSSAPCDRARQAYTFGLRTMVCLPLATGVLELGSTD VIFQTGDSIPRIRALFNLSAAAASSWPPHPDAASADPSVLWLADAPPMDMKDSISAADISVSKPPPPPPHQIQHFENGSTSTLTENPSPSVHAPTPSQPA APPQRQQQQQQ…
>OsMYC1
MVMKMEADEDGANGGTGGTWTDEDRALTASVLGTDAFAYLTKGGGAISEGLVAASLPVDLQNRLQELVESDRPGAGWNYAIFWQ LSRTKSGDLVLGWGDGSCREPHDGEMGPAASAGSDEAKQRMRKRVLQRLHSAFGGVDEEDYAPGIDQVTDTEMFFLASMYFAFPRRAGGPGQVFAAGVPL WIPNTERNVFPANYCYRGYLANAAGFRTIVLVPFETGVLELGSMQQVAESSDTLQTIRSVFAGAIGNKAGVQRHEGSGPTDKSPGLAKIFGKDLNLGRPS AGPGTGVSEADERSWEQRTGGGSSLLPNVQRGLQNFTWSQARGLNSHQQKFGNGILIVSNEATPRNNGGVDSSTATQFQLQKAPPLQKLPQLQKSHQLVK PQQLVSQQQLQ…
>OsMYC3
MSWSETDAALFAAVLGHDAAHHLATTPPHLDAPEGSPSSAELQASLHDLVERQGGAWTYGIFWQESRGAGAASGRAARAVLGWG DGHCRDGAGHGEVGAAERSVARKRVLLRLHALYGGGDEDGADYALRLDRVTGAEMYFLASMYFSFPEGSGGPGRALASGRHAWADVDPHPSGSGSAPGWY VRSSLAQSAGLRTVVFLPCKGGVLELGSVVAIRETPEVLRAIQSAMRAVPAPPEDFMRIFGKDLSPGRPSQPMGCDAPWTPRLVVQTTPVRPAKKEVVKA KPAEPPKSLDFSKANVQEQAGGQERRPRKRGRKPANGREEPLNHVEAERQRREKLNQRFYALRAVVPKISKMDKASLLSDAIAYIQELEARLRGDAPVPA RADGPAVEVKA…
>OsMYC7
MEETPLPSGKNFRSQLAAAARSINWTYAIFWSISTSRPGVLTWKDGFYNGEIKTRKITNSMNLMADELVLQRSEQLRELYDSLL SGECGHRARRPVAALLPEDLGDTEWYYVVCMTYAFGPRQGLPGKSFASNEFVWLTNAQSADRKLFHRALIAKSASIKTIVCVPFIMHGVLELGTTDPISE DPALVDRIAASFWDTPPRAAFSSEAGDADIVVFEDLDHGNAAVEATTTTVPGEPHAVAGGEVAECEPNSDNDLEQITMDDIGELYSLCEELDVVRPLDDD SSSWAVADPWSSFQLVPTSSPAPDQAPAAEATDVDDVVVAALDSSSIDGSCRPSPSSFVAWKRTADSDEVQAVPLISGEPPQKLLKKAVAGAGAWMNNGD SSAAAMTTQGS…
>OsMYC6
MASAPPVQEEPLQPGTNHFRSLLAAAVRSISWSYAIFWSISTSCPGVLTWNDGFYNGVVKTRKISNSADLTAGQLVVQRSEQLR ELYYSLLSGECDHRARRPIAALSPEDLADTEWYYVVCMTYSFQPGQGLPGKSYASNASVWLRNAQSADSKTFLRSLLAKSASIQTIICIPFTSGVLELGT TDPVLEDPKLVNRIVAYFQELQFPICLEVLMSTSPSPNETEDADIVSEGLITHNAIEEGQMVVSDECVSNANRDPITMEIDELYSIYEDLDLDMDLDLDT VRFLEDNGWPVNPSSFQLVPASSTEAVAAAAAANDVDGVANSQVSCFMAWKSAKSNEMAVPVVTGIESQKLLKKVVDCGARMSTGRGSRAALTQESGIKN HVISERRRREK…
>OsMYC4
MAGAAPLRDSLRRLCTDVGWSYAVFWRATRAADSQRLKLVWGDGHYERAAGAPSISGFEAMDLLLKEKAAALRSGTGRGGGGGE GHAADGAAGHSHDRVDALVHKAMAQQVHVVGEGVIGQAALTGLHRWIVHDIVDECEEEDEVLLEMKGQFCAGIQTIAVIPVLPRGVIQLGSTKMVMEEAA FIDHVRSLFQQLGSSTAVVPCGSFVQDSIMRTPFHKSLGVPTSSHSEDLAGGGNTYNDDMINHQFRHQKSPASTIQSFNPVQQFYAGPTFCRPVTIASRC DLFQPDHGSTFTLNSQSEDNRSTALLKNSVSHSKTSNDAFSHAFNPLNEPNVSISGRRECVSIEQHGSCRNGEMEITIGRTASSSCTGKTNIINKVDDLL SQDCLVGCQAS…
>OsMYC5
MGRGDHLLMKNSNAAAAAAAVNGGGTSLDAALRPLVGSDGWDYCIYWRLSPDQRFLEMTGFCCSSELEAQVSALLDLPSSIPLD SSSIGMHAQALLSNQPIWQSSSEEEEADGGGGAKTRLLVPVAGGLVELFASRYMAEEQQMAELVMAQCGGGGAGDDGGGQAWPPPETPSFQWDGGADAQR LMYGGSSLNLFDAAAADDDPFLGGGGGDAVGDEAAAAGAWPYAGMAVSEPSVAVAQEQMQHAAGGGVAESGSEGRKLHGGDPEDDGDGEGRSGGAKRQQC KNLEAERKRRKKLNGHLYKLRSLVPNITKMDRASILGDAIDYIVGLQKQVKELQDELEDNHVHHKPPDVLIDHPPPASLVGLDNDDASPPNSHQQQPPLA VSGSSSRRSNK…
>AtMYC1
MSLTMADGVEAAAGRSKRQNSLLRKQLALAVRSVQWSYAIFWSSSLTQPGVLEWGEGCYNGDMKKRKKSYESHYKYGLQKSKELRKLYLSMLEGDSGTTV STTHDNLNDDDDNCHSTSMMLSPDDLSDEEWYYLVSMSYVFSPSQCLPGRASATGETIWLCNAQYAENKLFSRSLLARSASIQTVVCFPYLGGVIELGVT ELISEDHNLLRNIKSCLMEISAHQDNDDEKKMEIKISEEKHQLPLGISDEDLHYKRTISTVLNYSADRSGKNDKNIRHRQPNIVTSEPGSSFLRWKQCEQ QVSGFVQKKKSQNVLRKILHDVPLMHTKRMFPSQNSGLNQDDPSDRRKENEKFSVLRTMVPTVNEVDKESILNNTIKYLQELEARVEELESCMGSV…
>AtEGL3
MATGENRTVPDNLKKQLAVSVRNIQWSYGIFWSVSASQPGVLEWGDGYYNGDIKTRKTIQAAEVKIDQLGLERSEQLRELYESLSLAESSASGSSQVTRR ASAAALSPEDLTDTEWYYLVCMSFVFNIGEGIPGGALSNGEPIWLCNAETADSKVFTRSLLAKSASLQTVVCFPFLGGVLEIGTTEHIKEDMNVIQSVKT LFLEAPPYTTISTRSDYQEIFDPLSDDKYTPVFITEAFPTTSTSGFEQEPEDHDSFINDGGASQVQSWQFVGEEISNCIHQSLNSSDCVSQTFVGTTGRL ACDPRKSRIQRLGQIQEQSNHVNMDDDVHYQGVISTIFKTTHQLILGPQFQNFDKRSSFTRWKRSSSVKTLGEKSQKMIKKILFEVPLMNKKEELL…
>AtAMS
MESNMQNLLEKLRPLVGARAWDYCVLWRLNEDQRFVKWMGCCCGGTELIAENGTEEFSYGGCRDVMFHHPRTKSCEFLSHLPASIPLDSGIYAETLLTNQ TGWLSESSEPSFMQETICTRVLIPIPGGLVELFATRHVAEDQNVVDFVMGHCNMLMDDSVTINMMVADEVESKPYGMLSGDIQQKGSKEEDMMNLPSSYD ISADQIRLNFLPQMSDYETQHLKMKSDYHHQALGYLPENGNKEMMGMNPFNTVEEDGIPVIGEPSLLVNEQQVVNDKDMNENGRVDSGSDCSDQIDDEDD PKYKKKSGKGSQAKNLMAERRRRKKLNDRLYALRSLVPRITKLDRASILGDAINYVKELQNEAKELQDELEENSETEDGSNRPQGGMSLNGTVVTG…
>AtTT8
MDESSIIPAEKVAGAEKKELQGLLKTAVQSVDWTYSVFWQFCPQQRVLVWGNGYYNGAIKTRKTTQPAEVTAEEAALERSQQLRELYETLLAGESTSEAR ACTALSPEDLTETEWFYLMCVSFSFPPPSGMPGKAYARRKHVWLSGANEVDSKTFSRAILAKSAKIQTVVCIPMLDGVVELGTTKKVREDVEFVELTKSF FYDHCKTNPKPALSEHSTYEVHEEAEDEEEVEEEMTMSEEMRLGSPDDEDVSNQNLHSDLHIESTHTLDTHMDMMNLMEEGGNYSQTVTTLLMSHPTSLL SDSVSTSSYIQSSFATWRVENGKEHQQVKTAPSSQWVLKQMIFRVPFLHDNTKDKRLPREDLSHVVAERRRREKLNEKFITLRSMVPFVTKMDKVS…
>AtJAM3
MGQKFWENQEDRAMVESTIGSEACDFFISTASASNTALSKLVSPPSDSNLQQGLRHVVEGSDWDYALFWLASNVNSSDGCVLIWGDGHCRVKKGASGEDY SQQDEIKRRVLRKLHLSFVGSDEDHRLVKSGALTDLDMFYLASLYFSFRCDTNKYGPAGTYVSGKPLWAADLPSCLSYYRVRSFLARSAGFQTVLSVPVN SGVVELGSLRHIPEDKSVIEMVKSVFGGSDFVQAKEAPKIFGRQLSLGGAKPRSMSINFSPKTEDDTGFSLESYEVQAIGGSNQVYGYEQGKDETLYLTD EQKPRKRGRKPANGREEALNHVEAERQRREKLNQRFYALRAVVPNISKMDKASLLADAITYITDMQKKIRVYETEKQIMKRRESNQITPAEVDYQQ…
>AtJAM2
MNIGRLVWNEDDKAIVASLLGKRALDYLLSNSVSNANLLMTLGSDENLQNKLSDLVERPNASNFSWNYAIFWQISRSKAGDLVLCWGDGYCREPKEGEKS EIVRILSMGREEETHQTMRKRVLQKLHDLFGGSEEENCALGLDRVTDTEMFLLSSMYFSFPRGEGGPGKCFASAKPVWLSDVVNSGSDYCVRSFLAKSAG IQTVVLVPTDLGVVELGSTSCLPESEDSILSIRSLFTSSLPPVRAVALPVTVAEKIDDNRTKIFGKDLHNSGFLQHHQHHQQQQQQPPQQQQHRQFREKL TVRKMDDRAPKRLDAYPNNGNRFMFSNPGTNNNTLLSPTWVQPENYTRPINVKEVPSTDEFKFLPLQQSSQRLLPPAQMQIDFSAASSRASENNSD…
>AtJAM1
MNMSDLGWDDEDKSVVSAVLGHLASDFLRANSNSNQNLFLVMGTDDTLNKKLSSLVDWPNSENFSWNYAIFWQQTMSRSGQQVLGWGDGCCREPNEEEES KVVRSYNFNNMGAEEETWQDMRKRVLQKLHRLFGGSDEDNYALSLEKVTATEIFFLASMYFFFNHGEGGPGRCYSSGKHVWLSDAVNSESDYCFRSFMAK SAGIRTIVMVPTDAGVLELGSVWSLPENIGLVKSVQALFMRRVTQPVMVTSNTNMTGGIHKLFGQDLSGAHAYPKKLEVRRNLDERFTPQSWEGYNNNKG PTFGYTPQRDDVKVLENVNMVVDNNNYKTQIEFAGSSVAASSNPSTNTQQEKSESCTEKRPVSLLAGAGIVSVVDEKRPRKRGRKPANGREEPLNH…
>LaMYC4
MDQDLILSASSNSSSTTTTTTSSHLVPSVSSQPPAPLLQKKLQHILQTQPDWWAYAILWHTTKEDSGRIILTWADGHFQGTKNKNPISLIANPERKKVMRGIQALIGDAPDPITPLDGDVTDAEWFYVMSLAQSISLGDGVVGKAFNSGSLVWLSGGNQLRFYNCHRANEAQIHGMQTMVCIPTFDGVLELGSDLIITENWNLVQQVKSHFDSSSDPATTNDADALHFADKTISFADIAGFQETGKKQDPATNTAVLQKPAGVFSYLDSEHSDSDCQFFVETVETKRTPKKRGRKPNLGRDAPLNHVEAERQRREKLNHRFYALRSVVPNVSRMDKASLLSDAVSFIKELKSKVEELEAQTQSQRETNKVKTECADNQSTTTTTVDQVGPTTSSVEIEV…
>NaMYC4
MDELIFPSASISQENQPSTLEQRLQYILKSQTNSWAYAIFWQTTSNKDNNGSFFLTWGDGHFQGSNKDVE WFYVLSLAKSYSGNEGVIGKAFSTASFVWLNGAQQLQFCSCERAKEAQYNGVKTLVCVPISNGVLELGSS DIIKEDWTLVQQVKSLFCSVQENGPINFLDQNSTIYFANFDFVTGMQIDVQESDNNSSKKVATMSHASFL DSELSNSDCQLLEHPLQKSRVGSKIRRTYRKRERKPGVDCDKQMNHVEAERQRREKLNHRFYELRSVVPQ VTRMDKASLLSDAVAYINELKAKVDKLESKLHRVLELKKKPQMEHNDAVDNQSSTNSVDHVSPSPILK
>AaMYC4
MGKGSRTACRSASHQQFKDKAKNRVDDLQGMFNDLQFARKENRAGDVVILEEQVNQMLREWKAELNEASP ASSLIGGSHVSSDLSSDIRRLLQLCEEDDDATSKLSELPHINPKSEPDVQENSIQNLQGGKAAAAYQEDY FLNQDLSEHRFQEVDGYKANVSIESQHANVNYLEATNQLDFQLFNTHQELPHNIFLRFESGGQREEDVAH HISNLLPTICPPAAAFLRPKCALWDCPRPAKGSEWFLDYCSSVHALLALNEGPPGMIPVLRPGGIDLKDG PLFAALIAKTQGKNVGIPECEGAATTKSPWNAPELFDLNVLEGESIREWLFFDKPRRAFESGNRKQRSLP DYNGRGWHESRKQVMKEFGGLKRSYYMDPQPLANFEWHLYEYEV…
